# Supplementary material for: Trimetallic Chalcogenide Species: Synthesis, Structures, and Bonding
Source: MDPI journal article supplement (doi:10.3390/molecules27217473), 2022-11-02
Supplement: s1 [file s1]

# Trimetallic Chalcogenide Species: Synthesis, Structures, and Bonding

Sourav Kar <sup>1,†</sup>, Debipada Chatterjee <sup>1,†</sup>, Jean-François Halet<sup>2,\*</sup> and Sundargopal Ghosh<sup>1,\*</sup>

<sup>1</sup> Department of Chemistry, Indian Institute of Technology Madras, Chennai 600036, India

<sup>2</sup> Laboratory for Innovative Key Materials and Structures (LINK), IRL 3629, CNRS–Saint-Gobain–NIMS, National Institute for Materials Science (NIMS), Tsukuba 305-0044, Japan

\* Correspondence: jean-francois.halet@univ-rennes1.fr (J.-F.H.); sghosh@iitm.ac.in (S.G.)

† These authors contributed equally to this work.

## Table of Contents

### I. Spectroscopic Details

|            |                                                                                        |
|------------|----------------------------------------------------------------------------------------|
| Figure S1  | ESI-MS of compound <b>1</b>                                                            |
| Figure S2  | $^1\text{H}$ NMR spectrum of compound <b>1</b>                                         |
| Figure S3  | $^{11}\text{B}\{^1\text{H}\}$ NMR spectrum of compound <b>1</b>                        |
| Figure S4  | $^{13}\text{C}\{^1\text{H}\}$ NMR spectrum of compound <b>1</b>                        |
| Figure S5  | ESI-MS of compound <b>2</b>                                                            |
| Figure S6  | $^1\text{H}$ NMR spectrum of compounds <b>2</b>                                        |
| Figure S7  | $^{11}\text{B}\{^1\text{H}\}$ NMR spectrum of compound <b>2</b>                        |
| Figure S8  | $^{13}\text{C}\{^1\text{H}\}$ NMR spectrum of compounds <b>2</b>                       |
| Figure S9  | Combined ESI-MS of compounds <b>3</b> and <b>4</b>                                     |
| Figure S10 | Combined $^1\text{H}$ NMR spectrum of compounds <b>3</b> and <b>4</b>                  |
| Figure S11 | Combined $^{11}\text{B}\{^1\text{H}\}$ NMR spectrum of compounds <b>3</b> and <b>4</b> |
| Figure S12 | Combined $^{13}\text{C}\{^1\text{H}\}$ NMR spectrum of compound <b>3</b> and <b>4</b>  |

### II. Electronic Structure Analysis

|            |                                                                                                                                                                               |
|------------|-------------------------------------------------------------------------------------------------------------------------------------------------------------------------------|
| Figure S13 | Selected molecular orbitals of <b>1</b>                                                                                                                                       |
| Figure S14 | Selected molecular orbitals of <b>2</b>                                                                                                                                       |
| Figure S15 | Selected molecular orbitals of <b>3</b>                                                                                                                                       |
| Figure S16 | Selected molecular orbitals of <b>4</b>                                                                                                                                       |
| Figure S17 | Contour-line diagrams of the Laplacian of electron density in the S4-S5-S4' plane of <b>4</b>                                                                                 |
| Table S1   | NICS values in compounds <b>1-4</b>                                                                                                                                           |
| Table S2   | Calculated natural charges ( $q_{\text{NB}}$ , $q_{\text{B}}$ and $q_{\text{E}}$ ), natural valence population (Pop) and HOMO–LUMO gaps of compounds <b>1-4</b> (E = Se or S) |
| Table S3   | Wiberg Bond Indices (WBI) of selected bonds in <b>1-4</b>                                                                                                                     |
| Figure S18 | Optimized geometry of <b>1</b>                                                                                                                                                |
| Figure S19 | Optimized geometry of <b>2</b>                                                                                                                                                |
| Figure S20 | Optimized geometry of <b>3</b>                                                                                                                                                |
| Figure S21 | Optimized geometry of <b>4</b>                                                                                                                                                |

## I. Spectroscopic details

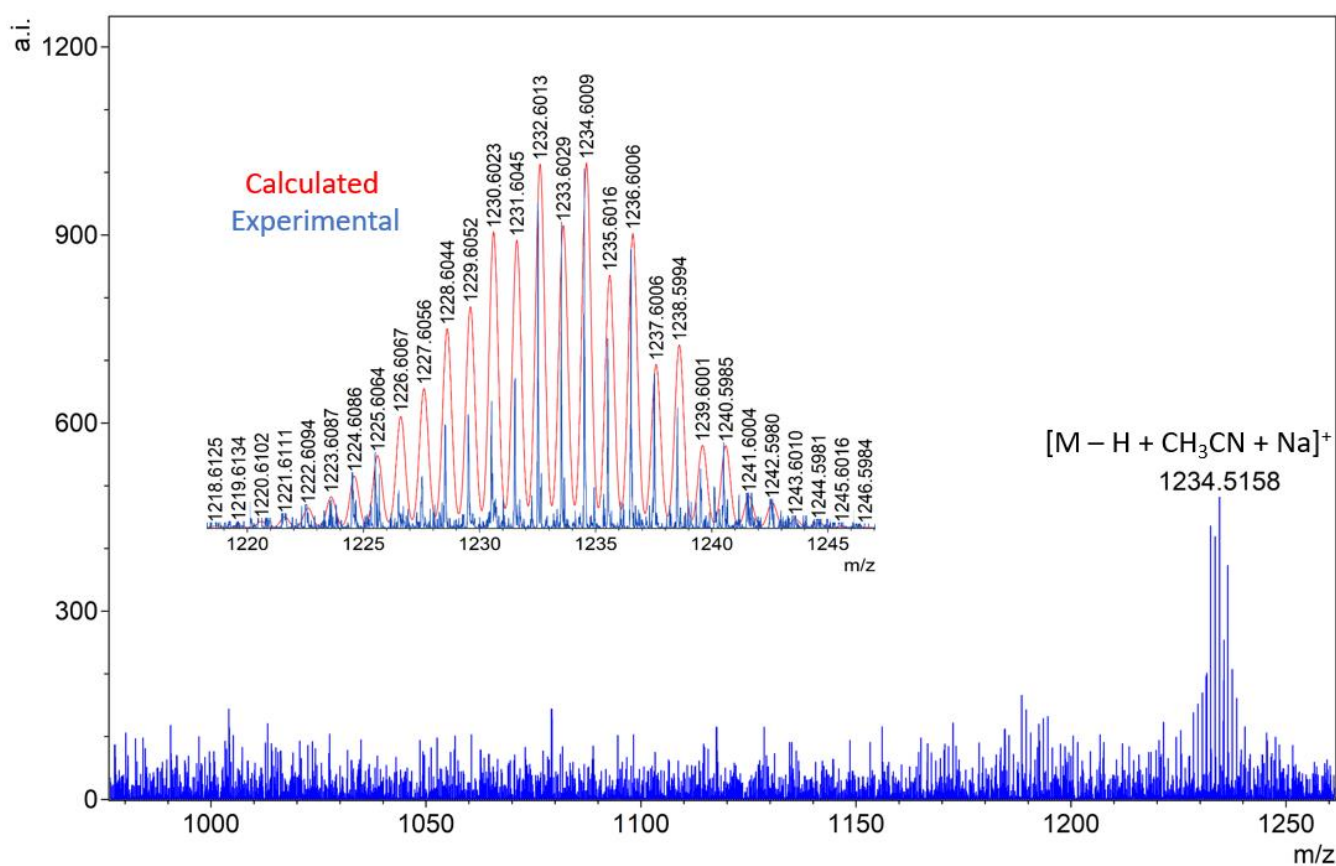

Figure S1. ESI-MS of compound 1.

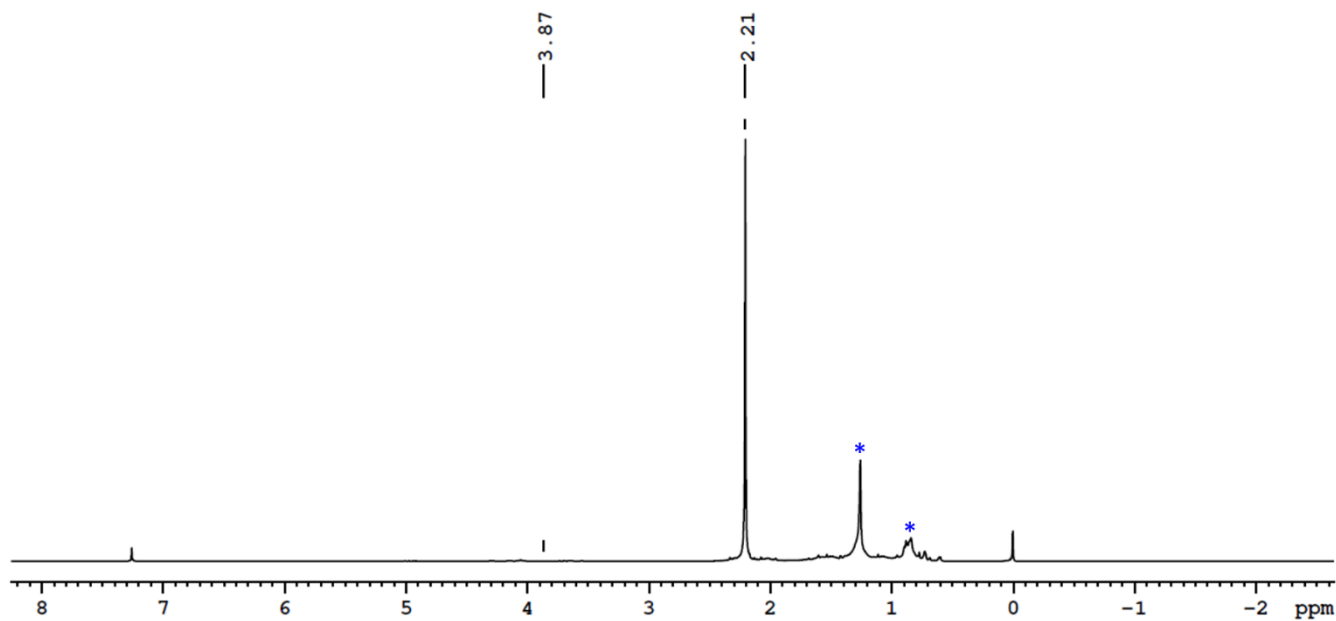

Figure S2.  $^1H$  NMR spectrum of compound 1 in  $CDCl_3$ . (\*Grease)

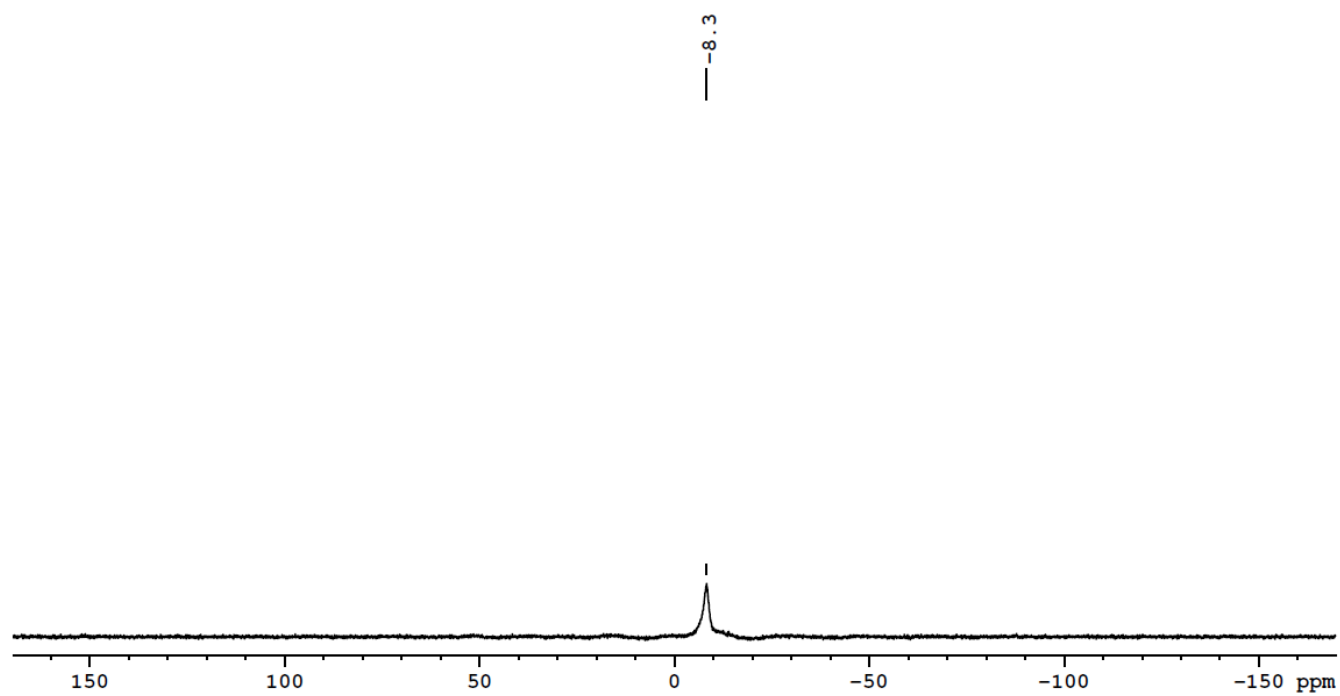

Figure S3.  $^{11}\text{B}\{^1\text{H}\}$  NMR spectrum of compound **1** in  $\text{CDCl}_3$  [1-4].

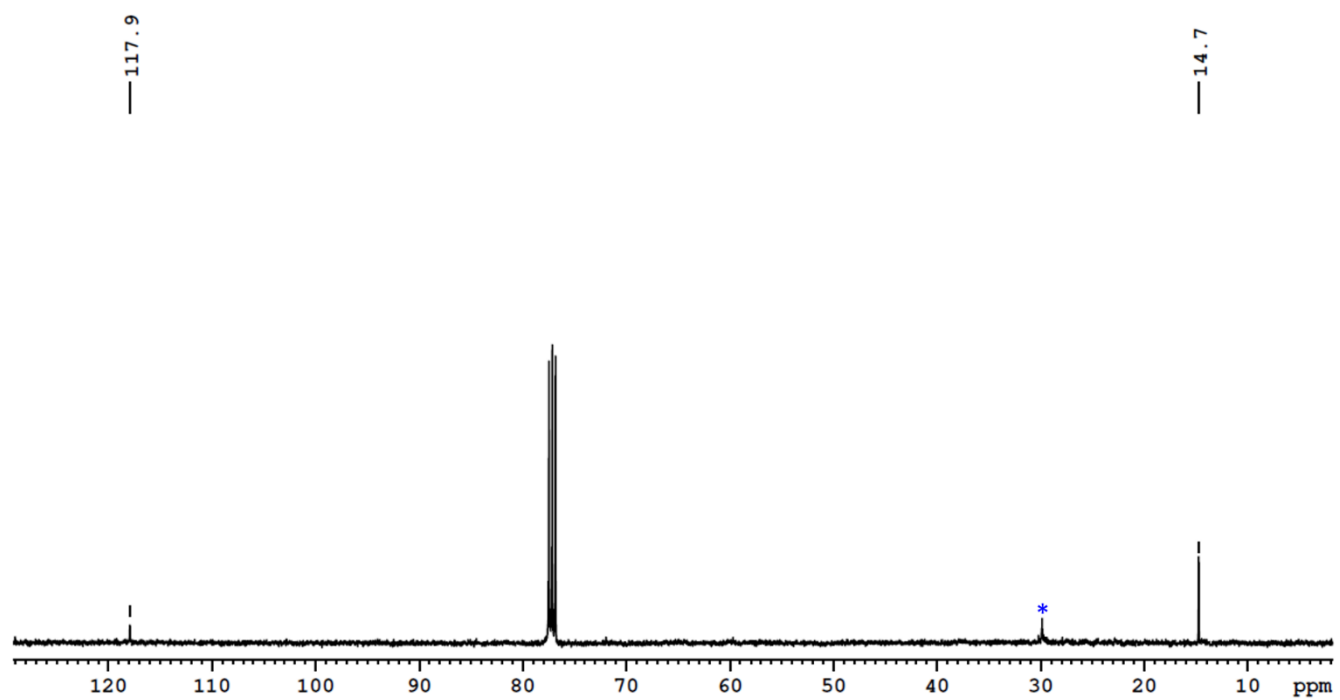

Figure S4.  $^{13}\text{C}\{^1\text{H}\}$  NMR spectrum of compound **1** in  $\text{CDCl}_3$ . (\*Grease)

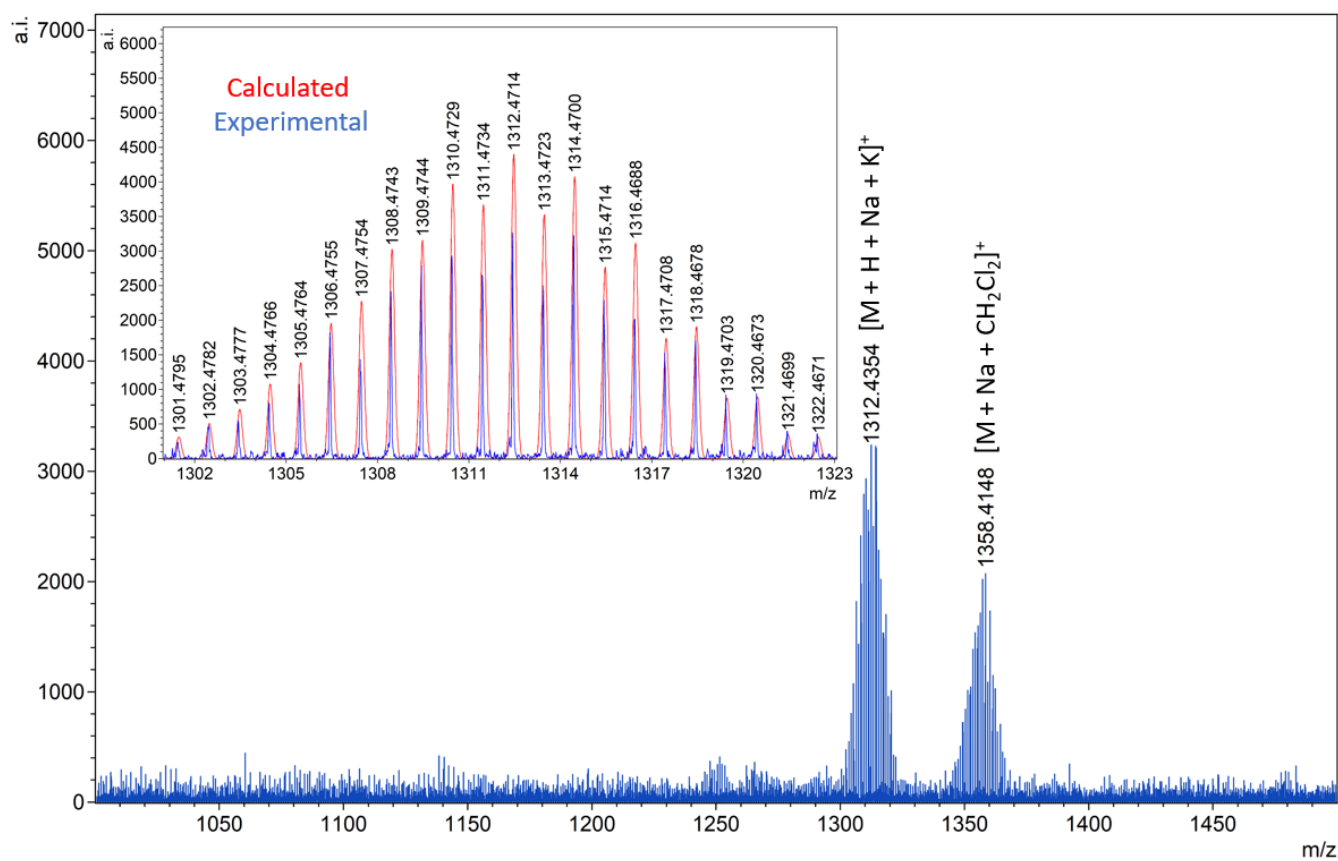

Figure S5. ESI-MS of compound 2.

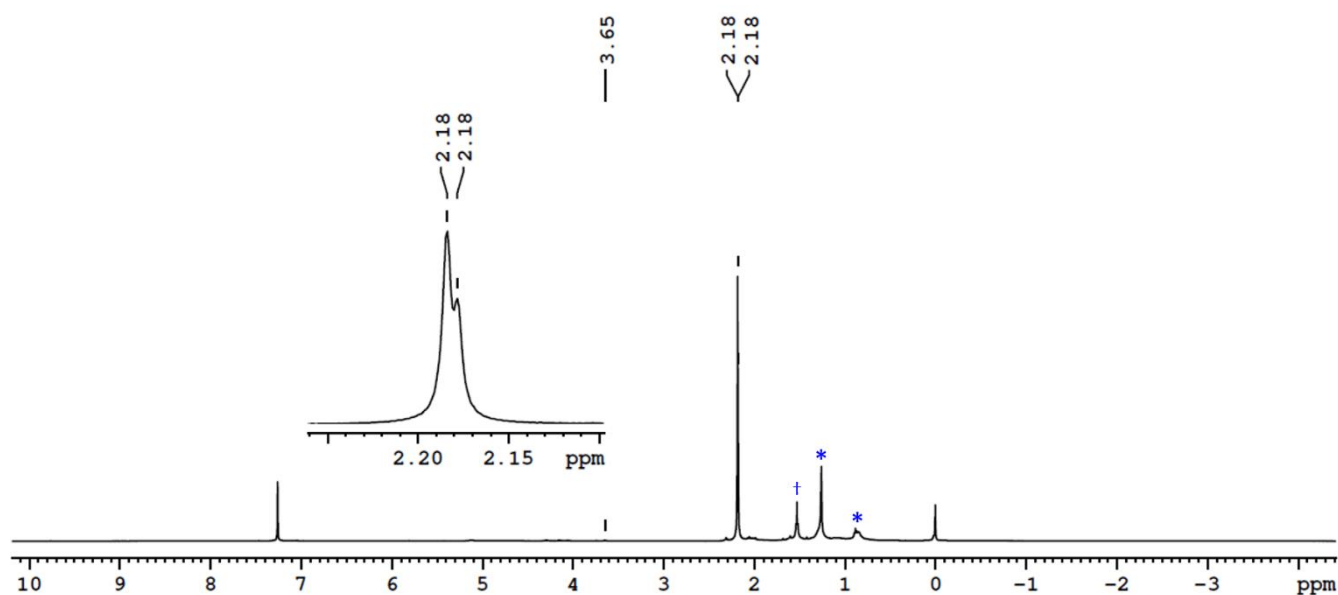

Figure S6.  $^1H$  NMR spectrum of compounds 2 in  $CDCl_3$ . (\*Grease,  $\dagger H_2O$ )

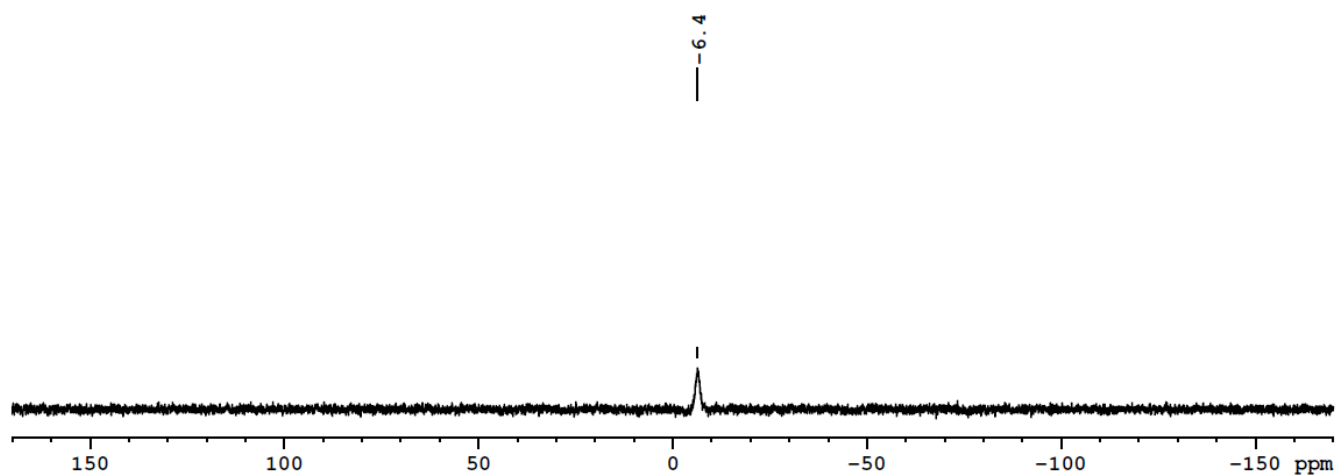

Figure S7.  $^{11}\text{B}\{^1\text{H}\}$  NMR spectrum of compound **2** in  $\text{CDCl}_3$  [1-4].

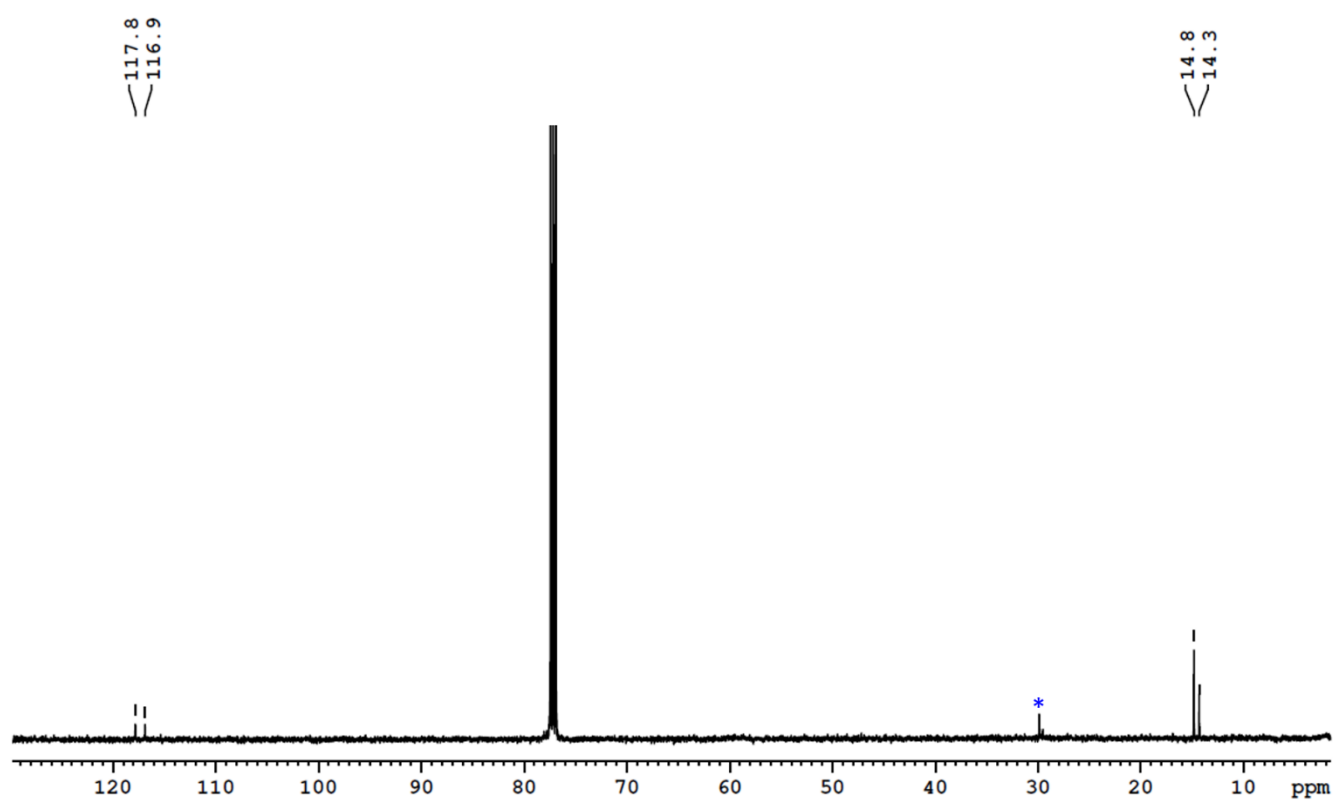

Figure S8.  $^{13}\text{C}\{^1\text{H}\}$  NMR spectrum of compounds **2** in  $\text{CDCl}_3$ . (\*Grease)

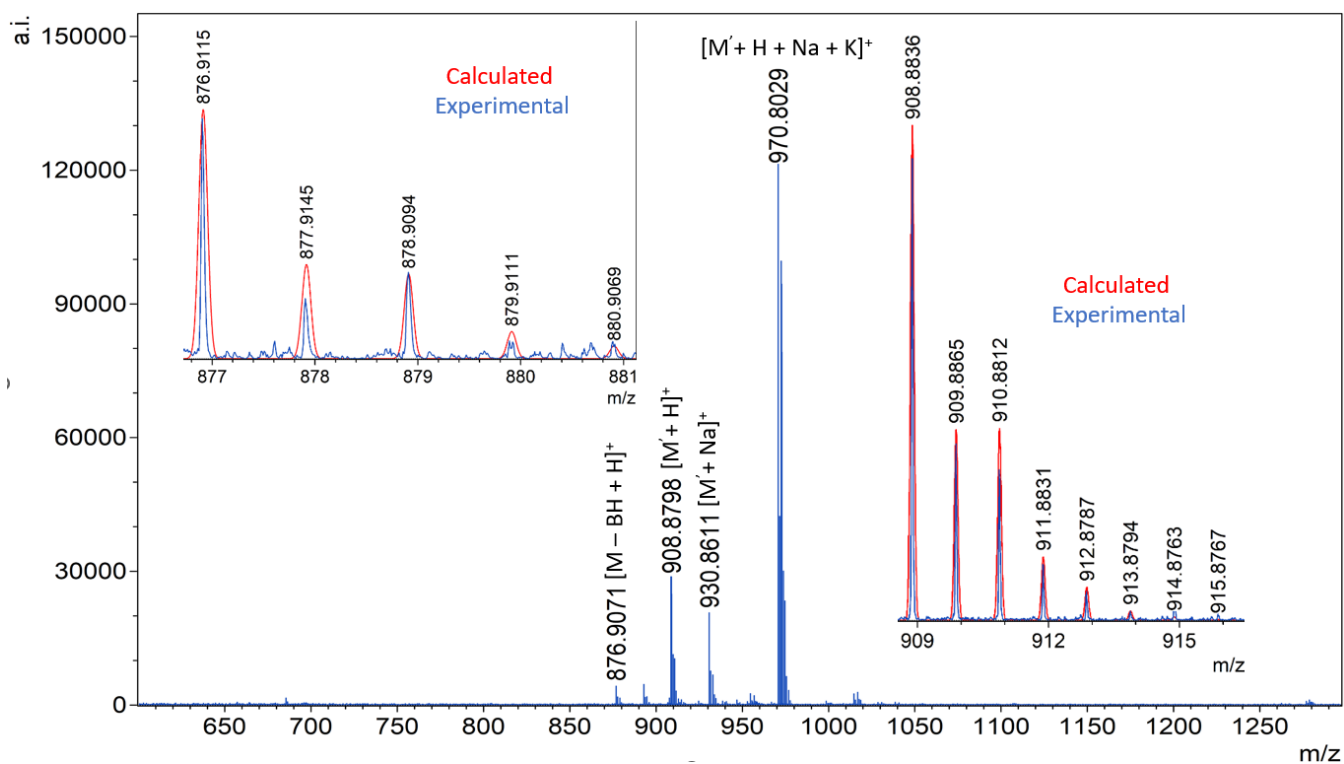

Figure S9. Combined ESI-MS of compounds 3 and 4.

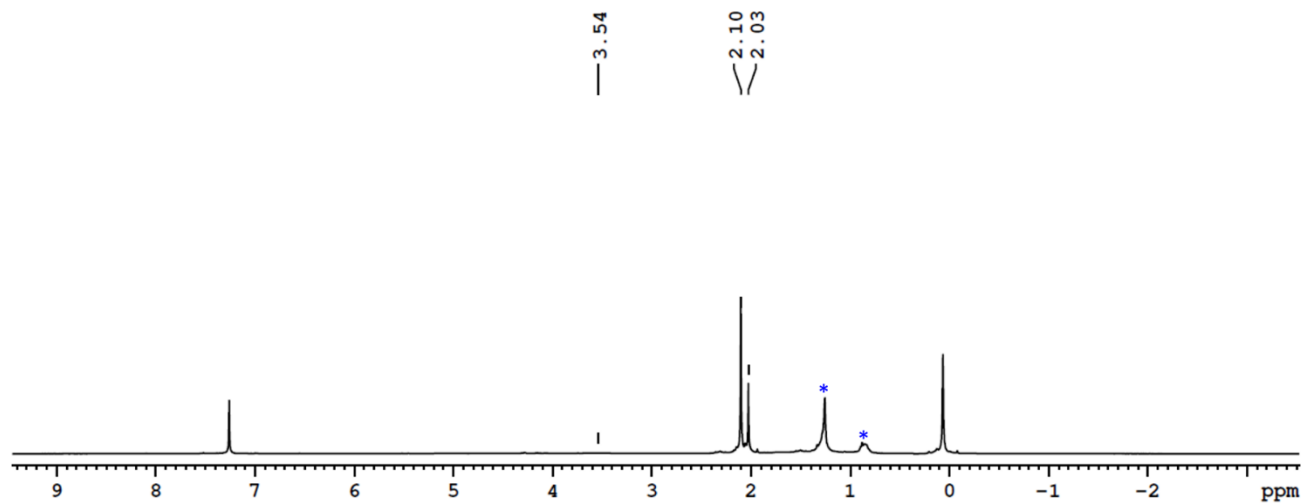

Figure S10. Combined <sup>1</sup>H NMR spectrum of compounds 3 and 4 in CDCl<sub>3</sub>. (\*Grease)

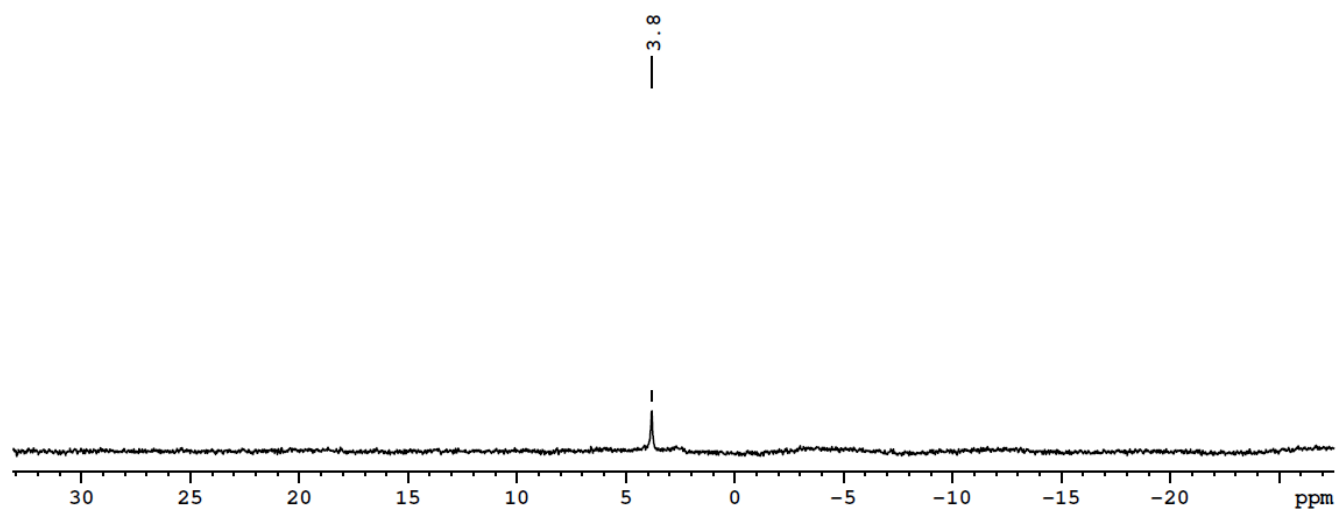

Figure S11. Combined  ${}^1\text{H}$  NMR spectrum of compounds **3** and **4** in  $\text{CDCl}_3$  [1-4].

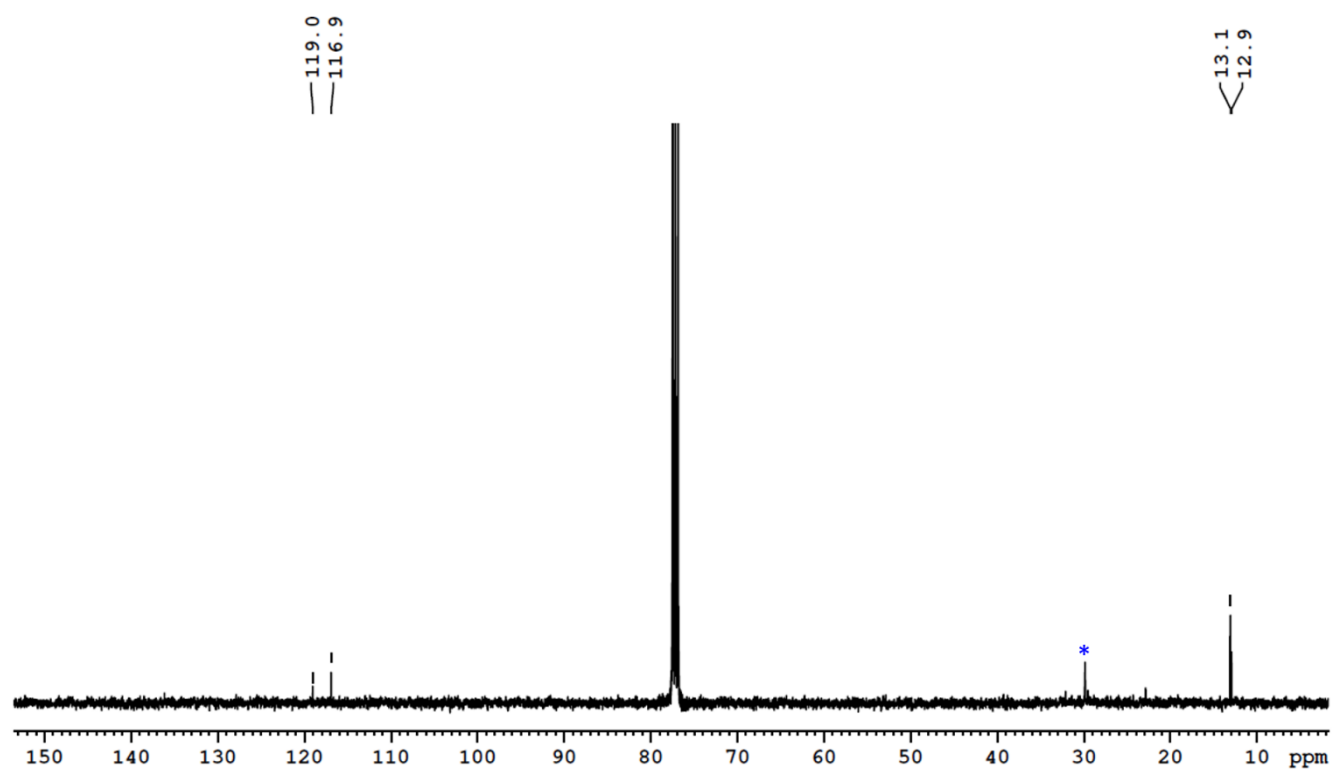

Figure S12. Combined  ${}^{13}\text{C}$  NMR spectrum of compounds **3** and **4** in  $\text{CDCl}_3$ . (\*Grease)



## II. Electronic Structure Analysis

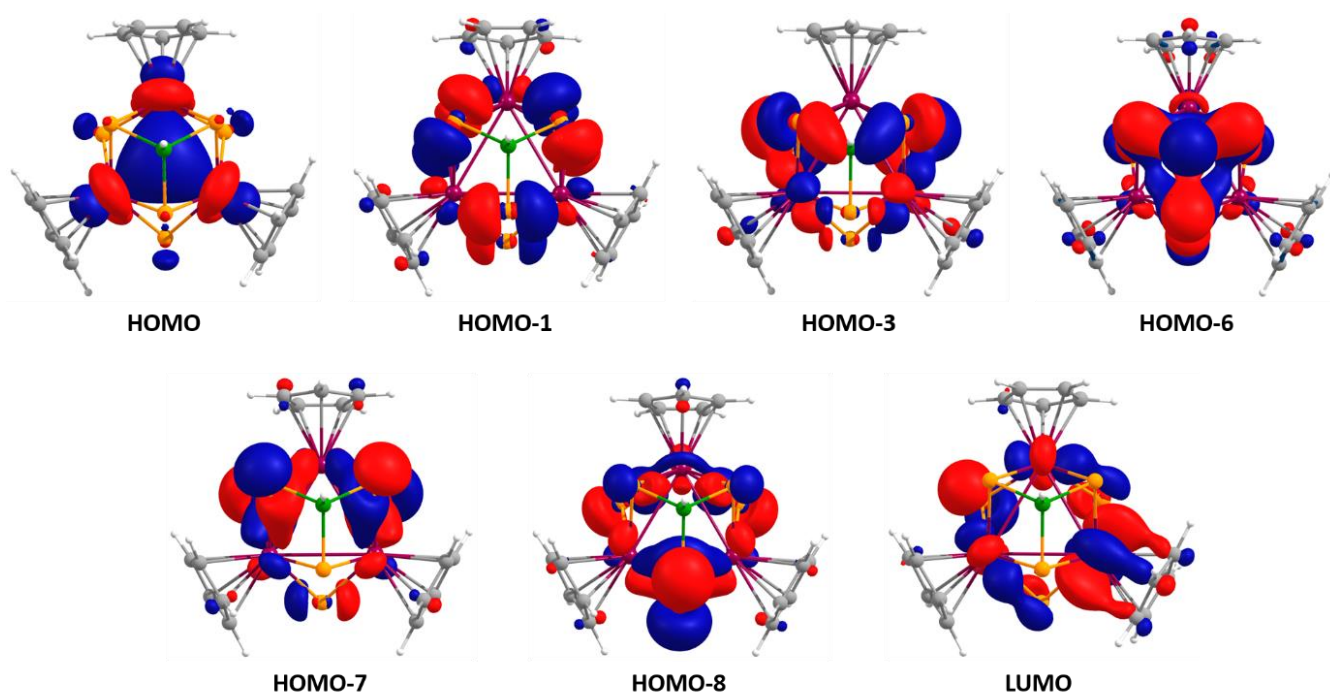

**Figure S13.** Selected molecular orbitals of **1**. (contour values for isosurface =  $\pm 0.04$  [ $e/\text{bohr}^3$ ] $^{1/2}$ ).

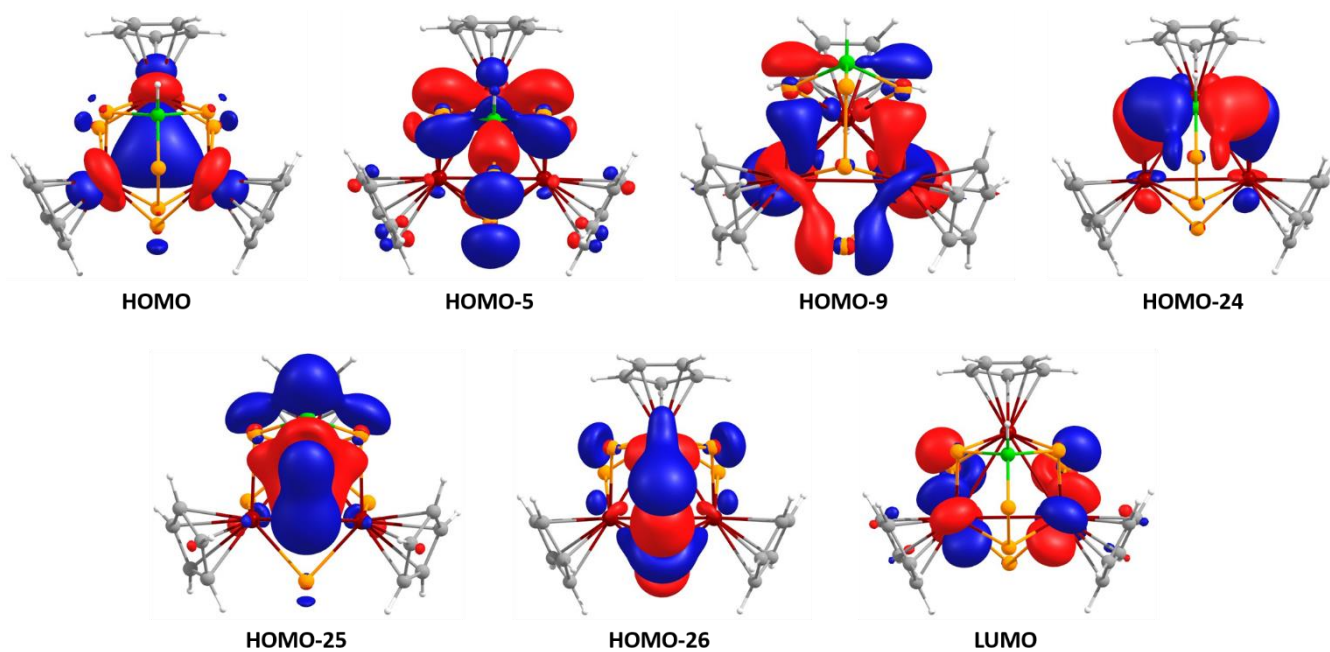

**Figure S14.** Selected molecular orbitals of **2**. (contour values for isosurface =  $\pm 0.04$  [ $e/\text{bohr}^3$ ] $^{1/2}$ ).

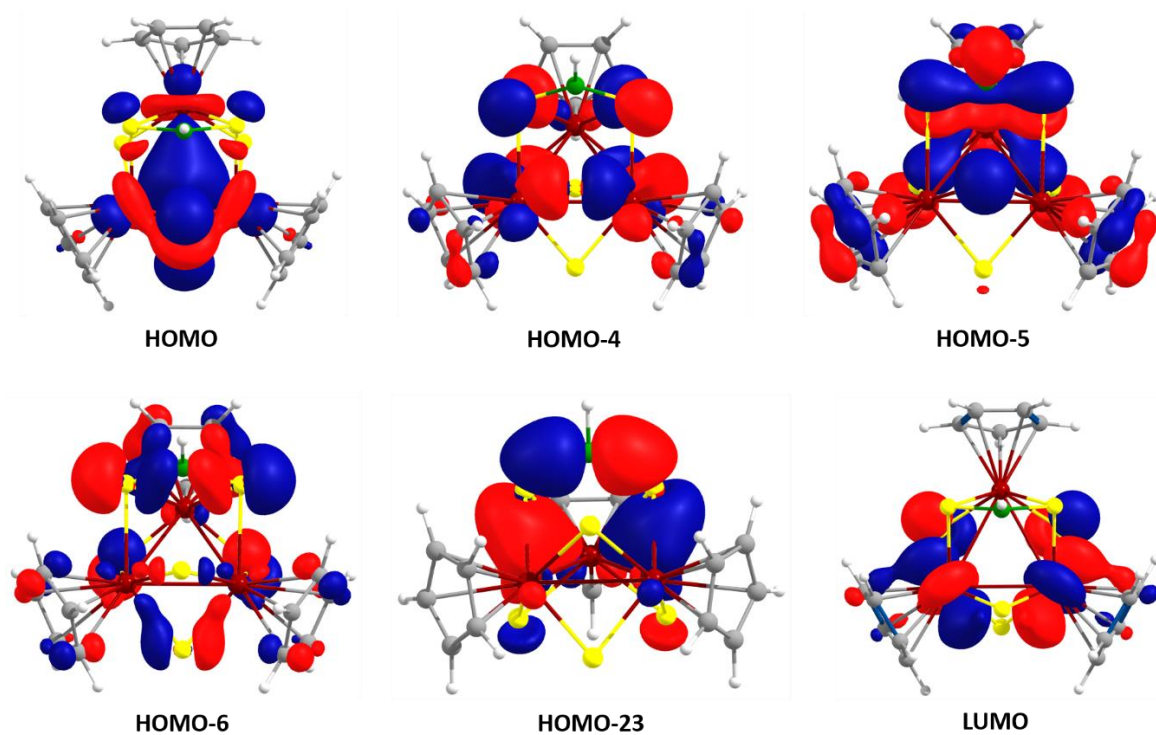

**Figure S15.** Selected molecular orbitals of **3**. (contour values for isosurface =  $\pm 0.04$  [e/bohr<sup>3</sup>]<sup>1/2</sup>).

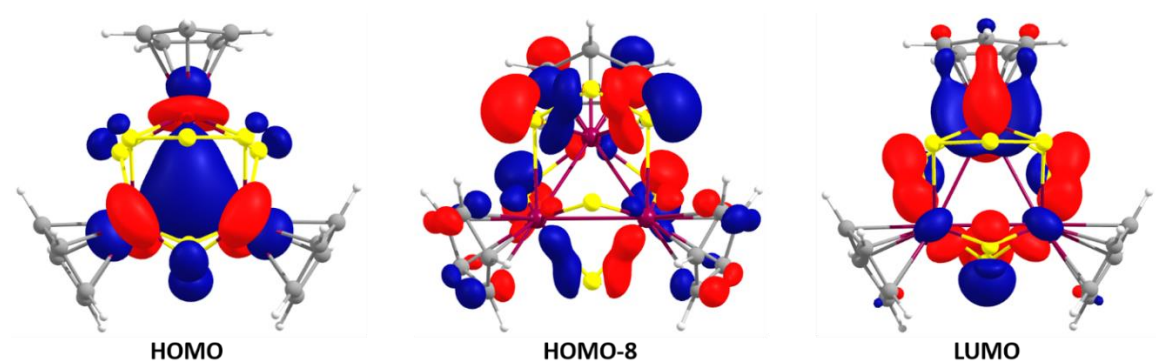

**Figure S16.** Selected molecular orbitals of **4**. (contour values for isosurface =  $\pm 0.04$  [e/bohr<sup>3</sup>]<sup>1/2</sup>).

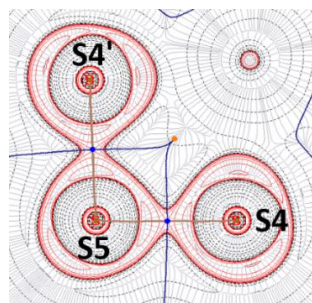

**Figure S17.** contour-line diagrams of the Laplacian of electron density in the S4-S5-S4' plane of **4**. In the contour-line diagrams of the Laplacian of electron density, solid red lines indicate areas of charge concentration [ $\nabla^2\rho(r) < 0$ ], while dashed black lines show areas of charge depletion [ $\nabla^2\rho(r) > 0$ ]. Blue dots indicate bond critical points (BCPs), and the brown line depicts the bond paths.

**Table S1.** NICS values in compounds 1-4.

|                           | Compound 1 | Compound 2 | Compound 3 | Compound 4 |
|---------------------------|------------|------------|------------|------------|
| NICS(0)                   | -16.8      | -20.3      | -17.7      | -21.0      |
| NICS <sub>zz</sub> (0)    | -48.1      | -46.8      | -45.7      | -47.5      |
| NICS(0.5)                 | -10.5      | -16.1      | -10.9      | -19.3      |
| NICS <sub>zz</sub> (0.5)  | -33.4      | -35.5      | -31.6      | -36.9      |
| NICS(-0.5)                | -17.3      | -19.8      | -18.5      | -18.5      |
| NICS <sub>zz</sub> (-0.5) | -44.5      | -42.3      | -40.7      | -40.3      |
| NICS(1)                   | -1.6       | -10.8      | -2.5       | -14.6      |
| NICS <sub>zz</sub> (1)    | -11.9      | -18.4      | -10.0      | -19.6      |
| NICS(-1)                  | -15.6      | -17.4      | -16.6      | -15.6      |
| NICS <sub>zz</sub> (-1)   | -32.8      | -31.3      | -29.3      | -27.2      |

**Table S2.** Calculated natural charges ( $q_{Nb}$ ,  $q_B$  and  $q_E$ ), natural valence population (Pop) and HOMO–LUMO gaps of compounds 1-4 (E = Se or S).

| Compounds | $q_{Nb}$ | $q_B$  | $q_E$  | Pop (Nb <sub>val</sub> ) | Pop (B <sub>val</sub> ) | Pop (E <sub>val</sub> ) | $\Delta E_{H-L}$ (eV) |
|-----------|----------|--------|--------|--------------------------|-------------------------|-------------------------|-----------------------|
| 1         | -0.574   | -0.155 | 0.209  | 5.510                    | 3.122                   | 5.776                   | 1.296                 |
|           | -0.574   |        | 0.209  | 5.510                    |                         | 5.776                   |                       |
|           | -0.578   |        | 0.214  | 5.139                    |                         | 5.771                   |                       |
|           |          |        | 0.310  |                          |                         | 5.679                   |                       |
|           |          |        | 0.310  |                          |                         | 5.679                   |                       |
|           |          |        | 0.312  |                          |                         | 5.677                   |                       |
| 2         | -0.617   | -0.281 | -0.026 | 5.554                    | 3.247                   | 6.007                   | 1.224                 |
|           | -0.617   |        | 0.251  | 5.554                    |                         | 5.733                   |                       |
|           | -0.560   |        | 0.251  | 5.496                    |                         | 5.733                   |                       |
|           |          |        | 0.262  |                          |                         | 5.715                   |                       |
|           |          |        | 0.323  |                          |                         | 5.665                   |                       |
|           |          |        | 0.323  |                          |                         | 5.665                   |                       |
| 3         | -0.378   | 0.304  | -0.031 | 5.312                    | 2.662                   | 6.015                   | 1.467                 |
|           | -0.378   |        | -0.031 | 5.312                    |                         | 6.015                   |                       |
|           | -0.338   |        | 0.043  | 5.264                    |                         | 5.944                   |                       |
|           |          |        | 0.167  |                          |                         | 5.819                   |                       |
|           |          |        | 0.167  |                          |                         | 5.819                   |                       |
|           |          |        | 0.167  |                          |                         | 5.819                   |                       |
| 4         | -0.425   | -      | 0.027  | 5.044                    | -                       | 5.941                   | 1.402                 |
|           | -0.425   |        | 0.147  |                          |                         | 5.827                   |                       |
|           | -0.393   |        | 0.147  |                          |                         | 5.827                   |                       |
|           |          |        | 0.144  |                          |                         | 5.842                   |                       |
|           |          |        | 0.144  |                          |                         | 5.842                   |                       |
|           |          |        | 0.173  |                          |                         | 5.813                   |                       |
|           |          |        | 0.113  |                          |                         | 5.872                   |                       |

**Table S3.** Wiberg Bond Indices (WBI) of selected bonds in **1-4**.

| Compound 1 |                     | Compound 2 |                     | Compound 3 |                     | Compound 4 |                     |
|------------|---------------------|------------|---------------------|------------|---------------------|------------|---------------------|
| Bonds      | WBIs                | Bonds      | WBIs                | Bonds      | WBIs                | Bonds      | WBIs                |
| Nb-Nb      | 0.362, 0.362, 0.365 | Nb-Nb      | 0.324, 0.381, 0.381 | Nb-Nb      | 0.355, 0.355, 0.467 | Nb-Nb      | 0.331, 0.331, 0.532 |
| B-Se       | 0.888, 0.888, 0.883 | B-Se       | 0.857, 0.857, 1.064 | B-S        | 1.047, 1.047        | S-S        | 0.956, 0.956        |

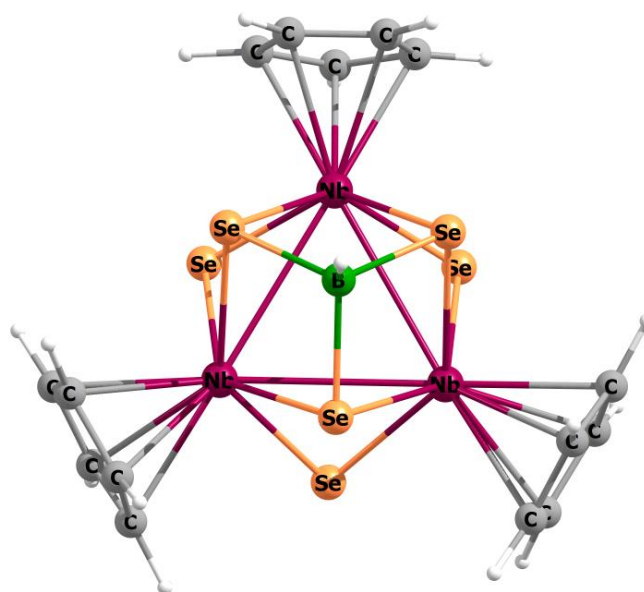

**Figure S18.** Optimized geometry of **1**

Total energy = -15186.64838990 a.u.

Cartesian coordinates for the calculated structure **1** (in Å)

|    |                 |                 |                 |    |                 |                 |                 |
|----|-----------------|-----------------|-----------------|----|-----------------|-----------------|-----------------|
| Nb | -0.145085000000 | -0.958719000000 | 1.651739000000  | C  | -1.367399000000 | -1.997108000000 | -3.491044000000 |
| Nb | -0.148633000000 | 1.912749000000  | 0.000000000000  | C  | -0.543073000000 | -3.022221000000 | -2.925253000000 |
| C  | -0.505895000000 | -1.016703000000 | 4.081052000000  | C  | 0.822064000000  | -2.662058000000 | -3.140073000000 |
| C  | -1.367399000000 | -1.997108000000 | 3.491044000000  | C  | 0.845048000000  | -1.420742000000 | -3.855838000000 |
| C  | -0.543073000000 | -3.022221000000 | 2.925253000000  | Se | -1.617646000000 | 1.083481000000  | -1.879579000000 |
| C  | 0.822064000000  | -2.662058000000 | 3.140073000000  | H  | 2.173466000000  | 4.003007000000  | 0.000000000000  |
| C  | 0.845048000000  | -1.420742000000 | 3.855838000000  | H  | 0.572807000000  | 4.019460000000  | -2.198730000000 |
| C  | -1.125459000000 | 4.074671000000  | 0.713442000000  | H  | -2.011916000000 | 4.098750000000  | -1.358596000000 |
| C  | 0.234599000000  | 4.046195000000  | 1.155338000000  | H  | -2.011916000000 | 4.098750000000  | 1.358596000000  |
| C  | 1.076683000000  | 4.031883000000  | 0.000000000000  | H  | 0.572807000000  | 4.019460000000  | 2.198730000000  |
| Se | -1.637118000000 | -2.155311000000 | 0.000000000000  | H  | -0.826266000000 | -0.111538000000 | 4.610266000000  |
| Se | -1.617646000000 | 1.083481000000  | 1.879579000000  | H  | -2.464382000000 | -1.976696000000 | 3.491031000000  |
| Se | 1.779278000000  | -1.874092000000 | 0.000000000000  | H  | -0.896706000000 | -3.925070000000 | 2.413722000000  |
| Se | 1.781607000000  | 0.932036000000  | -1.613203000000 | H  | 1.699978000000  | -3.239747000000 | 2.827994000000  |
| B  | 2.700827000000  | -0.006604000000 | 0.000000000000  | H  | 1.743308000000  | -0.883483000000 | 4.182164000000  |
| H  | 3.918138000000  | -0.012237000000 | 0.000000000000  | H  | 1.699978000000  | -3.239747000000 | -2.827994000000 |
| C  | -1.125459000000 | 4.074671000000  | -0.713442000000 | H  | -0.896706000000 | -3.925070000000 | -2.413722000000 |
| C  | 0.234599000000  | 4.046195000000  | -1.155338000000 | H  | -2.464382000000 | -1.976696000000 | -3.491031000000 |
| Se | 1.781607000000  | 0.932036000000  | 1.613203000000  | H  | -0.826266000000 | -0.111538000000 | -4.610266000000 |
| Nb | -0.145085000000 | -0.958719000000 | -1.651739000000 | H  | 1.743308000000  | -0.883483000000 | -4.182164000000 |
| C  | -0.505895000000 | -1.016703000000 | -4.081052000000 |    |                 |                 |                 |

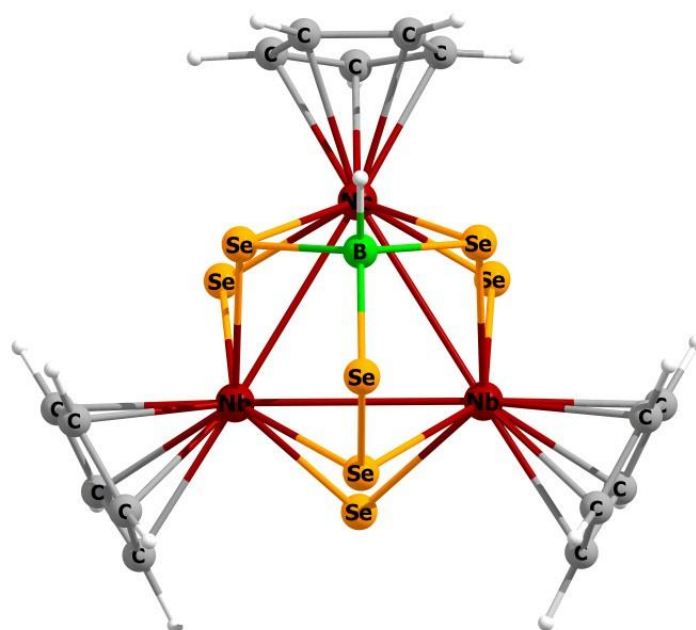

**Figure S19.** Optimized geometry of **2**

Total energy = -17588.21549380 a.u.

Cartesian coordinates for the calculated structure **2** (in Å)

|    |                 |                 |                 |    |                 |                 |                 |
|----|-----------------|-----------------|-----------------|----|-----------------|-----------------|-----------------|
| B  | -0.220851000000 | 0.000056000000  | 2.847468000000  | H  | 4.280185000000  | -2.201229000000 | 0.212176000000  |
| C  | -2.551212000000 | 3.215959000000  | -0.225598000000 | H  | 3.474943000000  | -1.360409000000 | 2.667229000000  |
| C  | -1.368782000000 | 3.901464000000  | 0.200233000000  | H  | 3.475098000000  | 1.360757000000  | 2.666745000000  |
| C  | -0.551252000000 | 4.124491000000  | -0.949624000000 | H  | 0.421238000000  | 4.630689000000  | -0.958655000000 |
| C  | -1.224200000000 | 3.572978000000  | -2.087914000000 | H  | -1.140108000000 | 4.209386000000  | 1.227309000000  |
| C  | -2.466085000000 | 3.023879000000  | -1.639604000000 | H  | -3.380838000000 | 2.907730000000  | 0.421760000000  |
| C  | -1.225680000000 | -3.572361000000 | -2.088089000000 | H  | -3.220132000000 | 2.534055000000  | -2.267176000000 |
| C  | -2.467196000000 | -3.023294000000 | -1.638710000000 | H  | -0.856453000000 | 3.581224000000  | -3.121817000000 |
| C  | -2.551327000000 | -3.215823000000 | -0.224702000000 | H  | -3.221628000000 | -2.533162000000 | -2.265578000000 |
| Nb | -0.656580000000 | 1.697791000000  | -0.621555000000 | H  | -3.380457000000 | -2.907719000000 | 0.423355000000  |
| Nb | -0.656906000000 | -1.697671000000 | -0.621529000000 | H  | -0.858668000000 | -3.580303000000 | -3.122256000000 |
| C  | -0.551975000000 | -4.124323000000 | -0.950466000000 | H  | 0.420436000000  | -4.630656000000 | -0.960362000000 |
| C  | -1.368658000000 | -3.901589000000 | 0.200046000000  | H  | -1.139270000000 | -4.209867000000 | 1.226857000000  |
| C  | 3.735682000000  | 0.716973000000  | 1.818443000000  | H  | 0.303903000000  | 0.000023000000  | 3.951861000000  |
| C  | 4.163254000000  | 1.157165000000  | 0.527481000000  | Se | -2.231259000000 | 0.000262000000  | 2.948377000000  |
| C  | 4.411259000000  | -0.000402000000 | -0.278354000000 | Se | 0.499125000000  | 1.629662000000  | 1.759578000000  |
| C  | 4.163141000000  | -1.157653000000 | 0.527893000000  | Se | 0.498804000000  | -1.629728000000 | 1.759634000000  |
| C  | 3.735603000000  | -0.716956000000 | 1.818698000000  | Se | -2.407926000000 | 0.000233000000  | 0.552744000000  |
| Nb | 2.023121000000  | -0.000245000000 | 0.218416000000  | Se | 1.714521000000  | 1.850121000000  | -1.469242000000 |
| H  | 4.280434000000  | 2.200615000000  | 0.211401000000  | Se | -1.419742000000 | 0.000067000000  | -2.354773000000 |
| H  | 4.750245000000  | -0.000603000000 | -1.321876000000 | Se | 1.714267000000  | -1.850580000000 | -1.469123000000 |



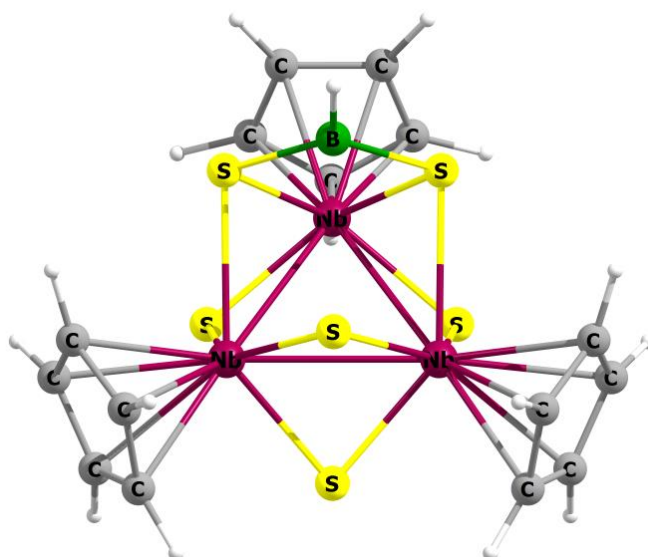

**Figure S20.** Optimized geometry of **3**.

Total energy = -3166.07166899 a.u.

Cartesian coordinates for the calculated structure **3** (in Å)

|    |                 |                 |                 |   |                 |                 |                 |
|----|-----------------|-----------------|-----------------|---|-----------------|-----------------|-----------------|
| Nb | 0.987690000000  | 1.512585000000  | -0.052489000000 | C | 2.783889000000  | -2.970737000000 | 0.778416000000  |
| Nb | -1.888828000000 | -0.000347000000 | -0.123699000000 | C | 1.564713000000  | -3.703743000000 | 0.930725000000  |
| C  | -4.005482000000 | 1.158159000000  | -0.611220000000 | C | 1.039252000000  | -3.965283000000 | -0.372708000000 |
| C  | -4.088161000000 | 0.715464000000  | 0.742405000000  | C | 1.921951000000  | -3.380750000000 | -1.333342000000 |
| C  | -4.088022000000 | -0.717835000000 | 0.741426000000  | S | 1.822649000000  | 0.000204000000  | -1.731168000000 |
| C  | -4.005279000000 | -1.158664000000 | -0.612801000000 | H | 3.433765000000  | -2.623285000000 | 1.589725000000  |
| C  | -3.934673000000 | 0.000322000000  | -1.451624000000 | H | 1.109228000000  | -4.005412000000 | 1.882194000000  |
| C  | 1.563294000000  | 3.704297000000  | 0.930809000000  | H | 0.108413000000  | -4.500321000000 | -0.595870000000 |
| C  | 1.037471000000  | 3.965611000000  | -0.372528000000 | H | 1.791627000000  | -3.391729000000 | -2.422552000000 |
| C  | 1.920349000000  | 3.381621000000  | -1.333335000000 | H | 3.849449000000  | -2.234425000000 | -1.068837000000 |
| S  | -0.991616000000 | -1.544717000000 | 1.766885000000  | H | 3.432995000000  | 2.624789000000  | 1.589468000000  |
| S  | -1.028295000000 | -1.780093000000 | -1.416317000000 | H | 3.848528000000  | 2.236351000000  | -1.069186000000 |
| S  | -1.028791000000 | 1.779256000000  | -1.416667000000 | H | 1.107803000000  | 4.005657000000  | 1.882374000000  |
| S  | 2.025873000000  | 0.000403000000  | 1.578964000000  | H | 0.106273000000  | 4.500083000000  | -0.595541000000 |
| C  | 2.782824000000  | 2.971943000000  | 0.778264000000  | H | 1.789843000000  | 3.392595000000  | -2.422524000000 |
| C  | 3.002505000000  | 2.770889000000  | -0.620961000000 | H | -3.980083000000 | 2.201121000000  | -0.947761000000 |
| S  | -0.992236000000 | 1.544372000000  | 1.766650000000  | H | -3.848590000000 | 0.001098000000  | -2.545366000000 |
| B  | -0.685711000000 | -0.000056000000 | 2.730005000000  | H | -3.979740000000 | -2.201172000000 | -0.950735000000 |
| H  | -0.544920000000 | 0.000108000000  | 3.935052000000  | H | -4.135670000000 | -1.363142000000 | 1.627077000000  |
| Nb | 0.988075000000  | -1.512319000000 | -0.052512000000 | H | -4.135972000000 | 1.359547000000  | 1.628940000000  |
| C  | 3.003677000000  | -2.769475000000 | -0.620752000000 |   |                 |                 |                 |

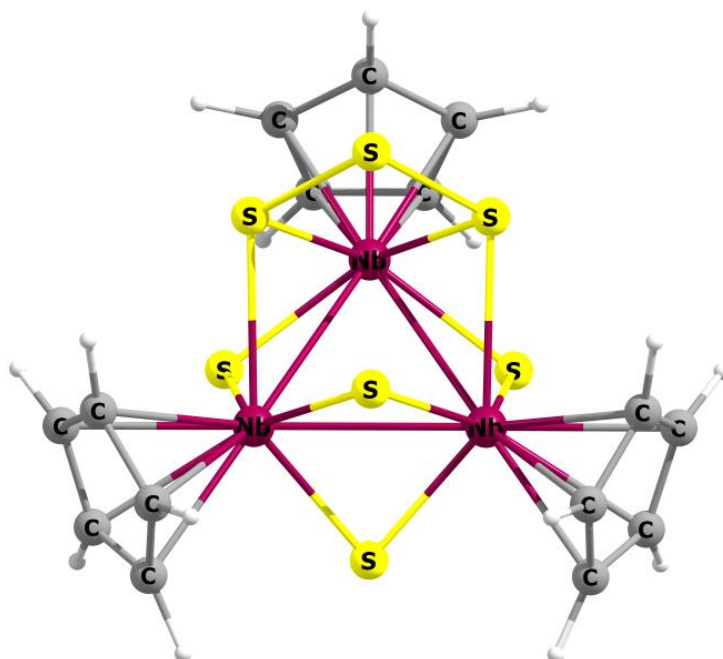

**Figure S21.** Optimized geometry of **4**.

Total energy = -3538.73407560 a.u.

Cartesian coordinates for the calculated structure **4** (in Å)

|    |                 |                 |                 |
|----|-----------------|-----------------|-----------------|
| Nb | 1.878372000000  | -0.000032000000 | -0.302178000000 |
| Nb | -1.052999000000 | 1.491642000000  | -0.148786000000 |
| C  | -1.114935000000 | 3.962996000000  | -0.080373000000 |
| C  | -1.822786000000 | 3.489256000000  | 1.067531000000  |
| C  | -2.986217000000 | 2.793708000000  | 0.608415000000  |
| C  | -2.992014000000 | 2.834956000000  | -0.822658000000 |
| C  | -1.833847000000 | 3.556852000000  | -1.248752000000 |
| C  | 4.074769000000  | 0.000147000000  | 0.765946000000  |
| C  | 4.038015000000  | 1.156788000000  | -0.075276000000 |
| C  | 3.965295000000  | 0.714488000000  | -1.431280000000 |
| S  | -1.863574000000 | 0.000100000000  | 1.563353000000  |
| S  | -1.883506000000 | -0.000041000000 | -1.833128000000 |
| S  | 0.996949000000  | 1.861568000000  | -1.463419000000 |
| S  | 1.038933000000  | -1.543687000000 | 1.553962000000  |
| S  | 0.883977000000  | 0.000025000000  | 3.024685000000  |
| C  | 4.038016000000  | -1.156782000000 | -0.074883000000 |
| C  | 3.965304000000  | -0.714945000000 | -1.431036000000 |
| S  | 1.038969000000  | 1.543694000000  | 1.553915000000  |
| Nb | -1.053046000000 | -1.491620000000 | -0.148730000000 |
| C  | -1.115069000000 | -3.963082000000 | -0.082915000000 |
| C  | -1.820902000000 | -3.490592000000 | 1.066755000000  |
| C  | -2.985074000000 | -2.794448000000 | 0.610455000000  |
| C  | -2.993300000000 | -2.833982000000 | -0.820650000000 |
| C  | -1.835895000000 | -3.555461000000 | -1.249594000000 |
| S  | 0.996867000000  | -1.861581000000 | -1.463412000000 |
| H  | 3.903453000000  | 1.359064000000  | -2.316610000000 |
| H  | 4.026767000000  | 2.199759000000  | 0.263861000000  |
| H  | 4.106253000000  | 0.000331000000  | 1.863397000000  |
| H  | 4.026772000000  | -2.199638000000 | 0.264608000000  |
| H  | 3.903469000000  | -1.359822000000 | -2.316147000000 |
| H  | -0.170985000000 | 4.522238000000  | -0.070191000000 |
| H  | -1.526329000000 | 3.626738000000  | 2.114741000000  |
| H  | -3.738442000000 | 2.309047000000  | 1.241603000000  |
| H  | -3.752591000000 | 2.392187000000  | -1.476627000000 |
| H  | -1.540464000000 | 3.750205000000  | -2.288011000000 |
| H  | -3.754899000000 | -2.390269000000 | -1.472787000000 |
| H  | -3.736259000000 | -2.310626000000 | 1.245513000000  |
| H  | -1.522702000000 | -3.629387000000 | 2.113297000000  |
| H  | -0.171188000000 | -4.522463000000 | -0.075010000000 |
| H  | -1.544288000000 | -3.747582000000 | -2.289585000000 |
